# Supplementary material for: Diagnostic Routes and Health Disparities in Advanced Colorectal Cancer: Evidence from a Nationwide Study in China
Source: Research Square preprint supplement (doi:10.21203/rs.3.rs-7290862/v1), 2025-09-09
Supplement: Supplementary file 1 [file 6121944b9da88cb6e2c0ec3d.docx]

**Supplemental materials**

Table S1 Distribution of sample size across geographical regions.

| Geographical regions | Hospitals | Sample Size |
| --- | --- | --- |
| Eastern | ⑪ Zhejiang Cancer Hospital | 437 |
| ⑩ School of Nursing, Jining Medical University | 882 |
| Northern | ③ Beijing Office for Cancer Prevention and Control, Peking University Cancer Hospital & Institute | 288 |
| ④ Department of Public Health and Preventive Medicine, Baotou Medical College | 277 |
| Southern | ⑫ Sun Yat-sen University Cancer Center | 168 |
| ⑬ The First Affiliated Hospital, Jinan University | 167 |
| ⑭ The First Affiliated Hospital of Guangxi Medical University | 168 |
| ⑮ Wuzhou Red Cross Hospital | 169 |
| Central | ⑧ Henan Cancer Hospital | 332 |
| ⑨ Xinxiang Central Hospital | 358 |
| Northeast | ① Cancer Hospital of China Medical University, Liaoning Cancer Hospital and Institute | 173 |
| ② Dalian Medical University | 191 |
| Southwest | ⑱ Sichuan Cancer Hospital & Institute | 222 |
| ⑲ Chengdu Medical College | 102 |
| ⑯ Chongqing Cancer Hospital | 164 |
| ⑰ Chongqing Medical University | 164 |
| Northwest | ⑦ Affiliated Tumor Hospital, Xinjiang Medical University | 166 |
| ⑤ Gansu Provincial Cancer Hospital | 88 |
| ⑥ The First People's Hospital of Lanzhou City | 73 |

Table S2 Selected nine items from EORTC QLQ-C30

| Scales or items | Questions |
| --- | --- |
| Physical scale | Do you need help with eating, dressing, washing yourself or using the toilet? |
| Cognitive scale | Have you had difficulty remembering things? |
| Emotional function | Did you feel irritable? |
|  | Did you feel depressed? |
| Social function | Has your physical condition or medical treatment interfered with your family life? |
|  | Has your physical condition or medical treatment interfered with your social activities? |
| Fatigue | Were you tired? |
| Sleep disturbance | Have you had trouble sleeping? |
| Financial impacts | Has your physical condition or medical treatment interfered with your financial difficulties? |
